# Supplementary material
Source: PubMed Central journal article supplement (PMC5510707)
Supplement: mmc1.pdf [file mmc1.pdf]

**Biophysical Journal, Volume 113**

**Supplemental Information**

**Molecular State of the Membrane-Active Antibiotic Daptomycin**

**Ming-Tao Lee, Wei-Chin Hung, Meng-Hsuan Hsieh, Hsiung Chen, Yu-Yung Chang, and Huey W. Huang**

## Supplemental Information

### for Molecular state of the membrane-active antibiotic daptomycin

Ming-Tao Lee, Wei-Chin Hung, Meng-Hsuan Hsieh, Hsiung Chen,  
Yu-Yung Chang and Huey W. Huang

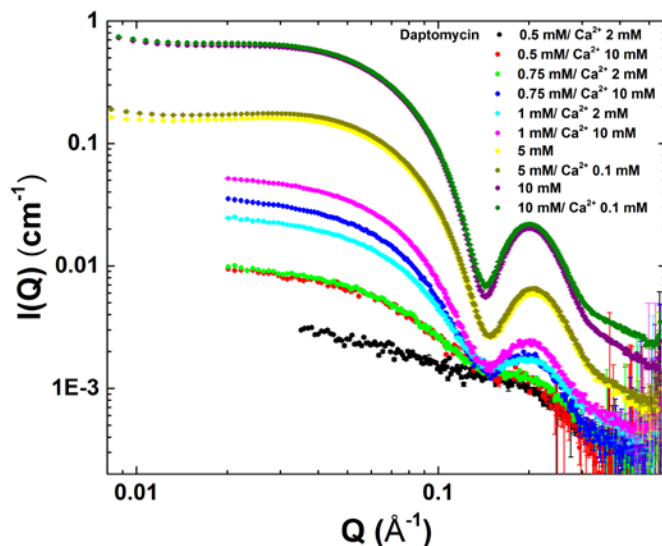

**Fig. S1** More small-angle X-ray scattering curves of daptomycin in solution, supplemental to Fig. 2a. The SAXS intensity profiles  $I(Q)$  at five different concentrations of daptomycin in 10 mM Tris buffer at pH 7.4 with  $\text{Ca}^{2+}$  from 0.1 to 10 mM.

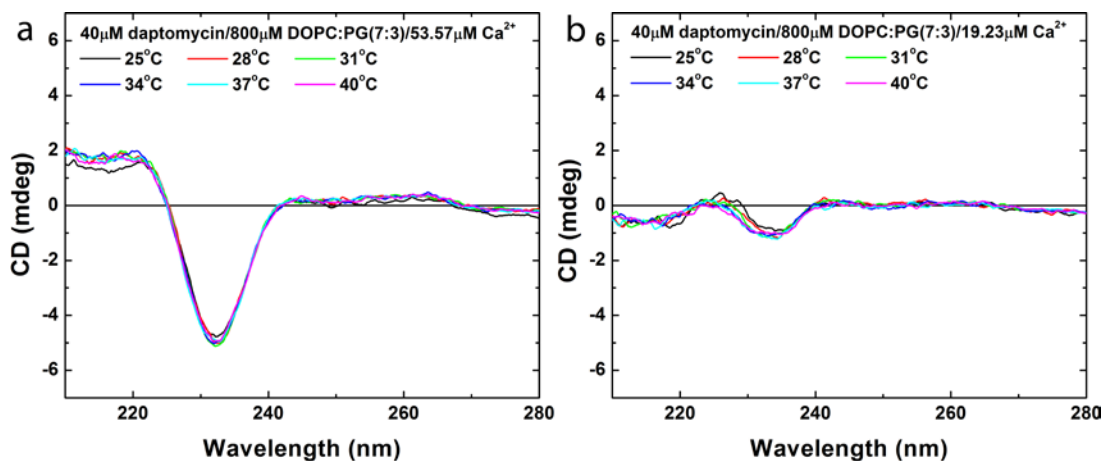

**Fig. S2** Temperature dependence of daptomycin CD spectra. (a) The sample is in 13% A and 87% B mixture, shown in Fig. 3b. (b) The sample is in 67% A and 33% B mixture, shown in Fig. 3b. We allowed 20 min for sample to reach equilibrium at each temperature. There is no detectable temperature dependence from 25° C to 40° C.

### **SAXS comparison**

Our SAXS measurement at NSSRC vs. Kirkham et al. (2016) at Diamond Light Source (DLS)

|                             | NSSRC (BL23A beamline)                         | DLS (B21 beamline)                       |
|-----------------------------|------------------------------------------------|------------------------------------------|
| Flux (photons/s)            | $10^{11}$                                      | $10^{11}$                                |
| Photon energy (keV)         | 15                                             | 12.4                                     |
| Detector                    | Pilatus 1M                                     | Pilatus 2M                               |
| Sample to detector distance | 1.83 m                                         | 4.01 m                                   |
| Sample cell                 | Quartz cuvette with<br>30 $\mu\text{m}$ window | Capillary with<br>100 $\mu\text{m}$ wall |

## SAXS model fittings

The SAXS data were modeled by using the software SasView (<http://www.sasview.org/> originally developed by the DANSE project under NSF award DMR-0520547). Solid sphere, core shell and RaspBerry models were used in the low, medium and high daptomycin concentrations respectively. The main parameters are listed in the following table: the fittings are shown in Fig. 1a.

(a) Sphere model

| Daptomycin (mM) | Ca <sup>2+</sup> (mM) | R (Å) |
|-----------------|-----------------------|-------|
| 0.5             | 0                     | 10.35 |
| 0.5             | 1                     | 10.60 |
| 0.75            | 0                     | 10.28 |

(b) Core shell model

| Daptomycin (mM) | Ca <sup>2+</sup> (mM) | R <sub>in</sub> (Å) | R <sub>out</sub> (Å) |
|-----------------|-----------------------|---------------------|----------------------|
| 0.75            | 1                     | 9.98                | 39.59                |
| 1               | 0                     | 10.41               | 37.86                |

(c) RaspBerry model

| Daptomycin (mM) | Ca <sup>2+</sup> (mM) | R <sub>o</sub> (Å) | R <sub>p</sub> (Å) | b (Å) | N  |
|-----------------|-----------------------|--------------------|--------------------|-------|----|
| 1               | 1                     | 19.27              | 10.67              | 9.07  | 28 |
| 2               | 0                     | 20.47              | 10.26              | 6.77  | 28 |
| 2               | 1                     | 19.96              | 10.15              | 7.00  | 28 |

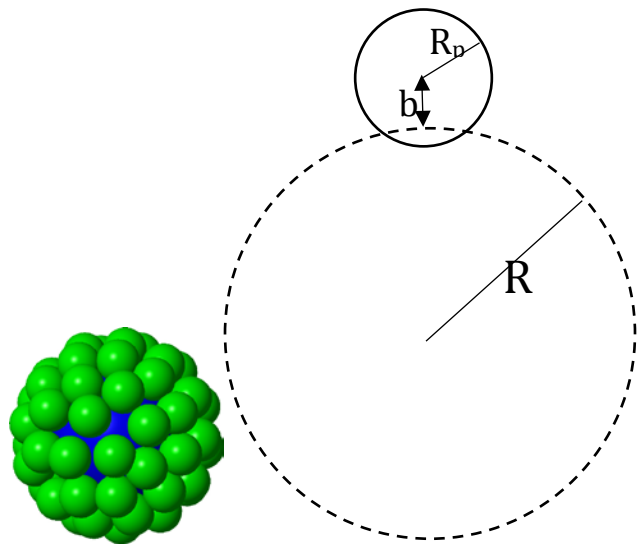

Cartoon for the RaspBerry model.
